# Supplementary material for: Does the implementation of UHC reforms foster greater equality in health spending? Evidence from a benefit incidence analysis in Burkina Faso
Source: HighWire-hosted journal article supplement (doi:10.1136/bmjgh-2021-005810), 2021-12-01
Supplement: bmjgh-2021-005810supp001_data_supplement.pdf [file bmjgh-2021-005810supp001_data_supplement.pdf]

## Appendix 1 – descriptive values (share of annual visits by socio-economic status & unit subsidies) used for public & overall Benefit Incidence Analysis

### Curative services

Table A1.1 Proportion of annual visits by quintile and related unit subsidy (CFA) of public spending on curative services (2009; 2014; 2017)

| Year                      |                | 2009 (n = 57,018)          |              |                            |               |                | 2014 (n = 72,616)          |              |                            |               |                | 2017 (n = 52, 680)         |               |                            |               |
|---------------------------|----------------|----------------------------|--------------|----------------------------|---------------|----------------|----------------------------|--------------|----------------------------|---------------|----------------|----------------------------|---------------|----------------------------|---------------|
| Population(Pop.) quintile | Pop. share (%) | Inpatient care(hospitals)  |              | Outpatient care            |               | Pop. share (%) | Inpatient care(hospitals)  |              | Outpatient care            |               | Pop. share (%) | Inpatient care(hospitals)  |               | Outpatient care            |               |
|                           |                | Share of annual visits (%) | Unit subsidy | Share of annual visits (%) | Unity subsidy |                | Share of annual visits (%) | Unit subsidy | Share of annual visits (%) | Unity subsidy |                | Share of annual visits (%) | Unity subsidy | Share of annual visits (%) | Unity subsidy |
| 1 (Poorest)               | 19.93          | 6.76                       | 20,079.73    | 13.39                      | 143.69        | 18.93          | 2.65                       | 6,768.30     | 12.21                      | 1,013.59      | 20.07          | 12.67                      | 11,670.87     | 24.07                      | 1,577.90      |
| 2                         | 20.43          | 15.76                      | 20,079.73    | 17.36                      | 143.69        | 19.62          | 7.65                       | 6,768.30     | 16.16                      | 1,013.59      | 19.94          | 12.67                      | 11,670.87     | 20.24                      | 1,577.90      |
| 3                         | 20.91          | 15.42                      | 20,079.73    | 21.15                      | 143.69        | 20.53          | 11.68                      | 6,768.30     | 20.96                      | 1,013.59      | 20.05          | 17.33                      | 11,670.87     | 19.41                      | 1,577.90      |
| 4                         | 20.08          | 33.98                      | 20,079.73    | 24.78                      | 143.69        | 21.79          | 18.33                      | 6,768.30     | 23.99                      | 1,013.59      | 19.96          | 26.00                      | 11,670.87     | 16.35                      | 1,577.90      |
| 5 (Least poor)            | 18.66          | 28.09                      | 20,079.73    | 23.32                      | 143.69        | 19.13          | 59.69                      | 6,768.30     | 26.69                      | 1,013.59      | 19.98          | 31.33                      | 11,670.87     | 19.92                      | 1,577.90      |

Table A1.2 Proportion of annual visits by quintile and related unit subsidy and unit cost (CFA) of overall spending on curative services (2009; 2014)

| Year                | 2009 (n = 57,018) |                            |                           |                |                            |                             |                | 2014 (n = 72,616) |                            |                            |                |                            |                             |                |
|---------------------|-------------------|----------------------------|---------------------------|----------------|----------------------------|-----------------------------|----------------|-------------------|----------------------------|----------------------------|----------------|----------------------------|-----------------------------|----------------|
| Population quintile | Pop. share (%)    | Inpatient care (hospitals) |                           |                | Outpatient care            |                             |                | Pop. share (%)    | Inpatient care (hospitals) |                            |                | Outpatient care            |                             |                |
|                     |                   | Share of annual visits (%) | Public&donor unit subsidy | OOPE Unit cost | Share of annual visits (%) | Public &donor unity subsidy | OOPE Unit cost |                   | Share of annual visits (%) | Public &donor unit subsidy | OOPE Unit cost | Share of annual visits (%) | Public &donor unity subsidy | OOPE Unit cost |
|                     |                   |                            |                           |                |                            |                             |                |                   |                            |                            |                |                            |                             |                |
| 1 (Poorest)         | 19.93             | 6.76                       | 2,624,600.59              | 8,140.34       | 13.39                      | 596.12                      | 270.93         | 18.93             | 2.65                       | 715,358.49                 | 36,056.64      | 12.21                      | 127,135.31                  | 266.15         |
| 2                   | 20.43             | 15.76                      | 2,624,600.59              | 2,563.62       | 17.36                      | 596.12                      | 148.11         | 19.62             | 7.65                       | 715,358.49                 | 8,445.01       | 16.16                      | 127,135.31                  | 136.07         |
| 3                   | 20.91             | 15.42                      | 2,624,600.59              | 1,151.33       | 21.15                      | 596.12                      | 602.17         | 20.53             | 11.68                      | 715,358.49                 | 28,233.67      | 20.96                      | 127,135.31                  | 535.32         |
| 4                   | 20.08             | 33.98                      | 2,624,600.59              | 3,216.79       | 24.78                      | 596.12                      | 602.17         | 21.79             | 18.33                      | 715,358.49                 | 10,194.03      | 23.99                      | 127,135.31                  | 265.06         |
| 5 (Least poor)      | 18.66             | 28.09                      | 2,624,600.59              | 5,180.66       | 23.32                      | 596.12                      | 417.08         | 19.13             | 59.69                      | 715,358.49                 | 4,261.05       | 26.69                      | 127,135.31                  | 324.21         |

Table A1.3 Proportion of annual visits by quintile and related unit subsidy (CFA) of overall spending on curative services (2017)

| Year                |                | 2017 (n = 52, 680)         |                                       |                 |                            |                             |        |
|---------------------|----------------|----------------------------|---------------------------------------|-----------------|----------------------------|-----------------------------|--------|
| Population quintile | Pop. share (%) | Inpatient care (hospitals) |                                       |                 | Outpatient care            |                             |        |
|                     |                | Share of annual visits (%) | Public&don or unit subsidy (Thousand) | OOPE (Thousand) | Share of annual visits (%) | Public &donor unity subsidy | OOPE   |
| 1 (Poorest)         | 20.07          | 1,221,767.95               | 12.22                                 | 8,485.31        | 24.07                      | 426.27                      | 150.76 |
| 2                   | 19.94          | 1,221,767.95               | 12.22                                 | 5,739.57        | 20.24                      | 358.44                      | 121.28 |
| 3                   | 20.05          | 1,221,767.95               | 12.22                                 | 21,400.63       | 19.41                      | 343.75                      | 645.25 |
| 4                   | 19.96          | 1,221,767.95               | 12.22                                 | 8,086.43        | 16.35                      | 289.55                      | 434.29 |
| 5 (Least poor)      | 19.98          | 1,221,767.95               | 12.22                                 | 9,133.91        | 19.92                      | 352.78                      | 485.07 |

## Institutional delivery

Table A1.4 Proportion of annual visits by quintile and related unit subsidy (CFA) of public spending on institutional delivery (2003; 2010; 2017)

| Year                |                    | 2003 (n = 41,520)          |              |                            |               |              | 2010 (n = 56,173)          |              |                            |               |              | 2017 (n = 15,914)          |              |                            |              |  |
|---------------------|--------------------|----------------------------|--------------|----------------------------|---------------|--------------|----------------------------|--------------|----------------------------|---------------|--------------|----------------------------|--------------|----------------------------|--------------|--|
|                     |                    | Public hospitals           |              | Public health centers      |               |              | Public hospitals           |              | Public health centers      |               |              | Public hospitals           |              | Public health centers      |              |  |
| Population quintile | Population share % | Share of annual visits (%) | Unit subsidy | Share of annual visits (%) | Unity subsidy | Pop. share % | Share of annual visits (%) | Unit subsidy | Share of annual visits (%) | Unity subsidy | Pop. share % | Share of annual visits (%) | Unit subsidy | Share of annual visits (%) | Unit subsidy |  |
| 1 (Poorest)         | 23.71              | 8.47                       | 2,066.23     | 15.04                      | 73.67         | 19.17        | 4.72                       | 4,553.60     | 12.10                      | 44.79         | 20.01        | 18.73                      | 290.02       | 19.28                      | 285.27       |  |
| 2                   | 15.62              | 4.24                       | 2,066.23     | 14.31                      | 73.67         | 19.24        | 8.49                       | 4,553.60     | 15.82                      | 44.79         | 20.04        | 17.82                      | 290.02       | 19.98                      | 285.27       |  |
| 3                   | 19.28              | 4.48                       | 2,066.23     | 16.25                      | 73.67         | 19.75        | 20.75                      | 4,553.60     | 19.60                      | 44.79         | 19.96        | 19.94                      | 290.02       | 20.18                      | 285.27       |  |
| 4                   | 20.20              | 14.28                      | 2,066.23     | 27.13                      | 73.67         | 21.02        | 26.42                      | 4,553.60     | 25.48                      | 44.79         | 20.02        | 16.31                      | 290.02       | 20.53                      | 285.27       |  |
| 5 (Least poor)      | 21.20              | 68.52                      | 2,066.23     | 27.26                      | 73.67         | 20.82        | 39.62                      | 4,553.60     | 27.00                      | 44.79         | 19.97        | 27.19                      | 290.02       | 20.03                      | 285.27       |  |

Table A1.5 Proportion of annual visits by quintile and related unit subsidy and unit cost (CFA) of overall spending on institutional delivery (2003; 2010)

| Year                |                | 2003 (n = 41,520)          |                           |               |                            |                      |               |                | 2010 (n = 56,173)          |                            |                |                            |                              |               |
|---------------------|----------------|----------------------------|---------------------------|---------------|----------------------------|----------------------|---------------|----------------|----------------------------|----------------------------|----------------|----------------------------|------------------------------|---------------|
| Population quintile | Pop. share (%) | Public hospitals           |                           |               | Public health centers      |                      |               |                | Public hospitals           |                            |                | Public health centers      |                              |               |
|                     |                | Share of annual visits (%) | Public&donor unit subsidy | OOP Unit cost | Share of annual visits (%) | Public unity subsidy | OOP Unit cost | Pop. share (%) | Share of annual visits (%) | Public &donor unit subsidy | OOPE Unit cost | Share of annual visits (%) | Public & donor unity subsidy | OOP Unit cost |
| 1(Poorest)          | 23.71          | 8.47                       | 168,042.45                | 128.03        | 15.04                      | 7,320.48             | 18.29         | 19.17          | 4.72                       | 2,462.18                   | 61.46          | 12.10                      | 12,132.23                    | 16.92         |
| 2                   | 15.62          | 4.24                       | 168,042.45                | 64.09         | 14.31                      | 7,320.48             | 17.40         | 19.24          | 8.49                       | 2,462.18                   | 110.55         | 15.82                      | 12,132.23                    | 22.12         |
| 3                   | 19.28          | 4.48                       | 168,042.45                | 67.72         | 16.25                      | 7,320.48             | 19.76         | 19.75          | 20.75                      | 2,462.18                   | 270.21         | 19.60                      | 12,132.23                    | 27.40         |
| 4                   | 20.20          | 14.28                      | 168,042.45                | 215.85        | 27.13                      | 7,320.48             | 32.99         | 21.02          | 26.42                      | 2,462.18                   | 344.04         | 25.48                      | 12,132.23                    | 35.63         |
| 5 (Least poor)      | 21.20          | 68.52                      | 168,042.45                | 1,035.74      | 27.26                      | 7,320.48             | 33.14         | 20.82          | 39.62                      | 2,462.18                   | 515.93         | 27.00                      | 12,132.23                    | 37.75         |

Note. There is no donor subsidy to public health centers in 2003 NHA

Table A1.6 Proportion of annual visits by quintile and related unit subsidy and unit cost (CFA) of overall spending on institutional delivery (2017)

| Year                | 2017 (n = 15,914) |                            |                           |        |                            |                             |      |
|---------------------|-------------------|----------------------------|---------------------------|--------|----------------------------|-----------------------------|------|
| Population quintile | Pop. share (%)    | Public hospitals           |                           |        | Public health centers      |                             |      |
|                     |                   | Share of annual visits (%) | Public&donor unit subsidy | OOPE   | Share of annual visits (%) | Public &donor unity subsidy | OOPE |
| 1 (Poorest)         | 20.01             | 18.73                      | 203,069.95                | 280.12 | 19.28                      | 15, 793.57                  | 6.14 |
| 2                   | 20.04             | 17.82                      | 203,069.95                | 266.51 | 19.98                      | 15, 793.57                  | 6.36 |
| 3                   | 19.96             | 19.94                      | 203,069.95                | 298.22 | 20.18                      | 15, 793.57                  | 6.42 |
| 4                   | 20.02             | 16.31                      | 203,069.95                | 243.93 | 20.53                      | 15, 793.57                  | 6.54 |
| 5 (Least poor)      | 19.97             | 27.19                      | 203,069.95                | 406.65 | 20.03                      | 15, 793.57                  | 6.38 |
