# Supplementary material for: Does the implementation of UHC reforms foster greater equality in health spending? Evidence from a benefit incidence analysis in Burkina Faso
Source: HighWire-hosted journal article supplement (doi:10.1136/bmjgh-2021-005810), 2021-12-01
Supplement: bmjgh-2021-005810supp002_data_supplement.pdf [file bmjgh-2021-005810supp002_data_supplement.pdf]

## Appendix 2 - Benefit incidence analysis of donor spending

Table A2.1 Benefit incidence of donor spending on curative care

| Year                                                         | 2009                             | 2014                             | 2017                              |
|--------------------------------------------------------------|----------------------------------|----------------------------------|-----------------------------------|
| Level of care                                                | CI (SE)                          | CI (SE)                          | CI (SE)                           |
| All public health facilities (inpatient and outpatient care) | 0.119 <sup>a***</sup><br>(0.013) | 0.186 <sup>a***</sup><br>(0.010) | -0.024 <sup>b*</sup><br>(0.014)   |
| Inpatient care (hospitals)                                   | 0.261 <sup>a***</sup><br>(0.046) | 0.525 <sup>a***</sup><br>(0.049) | 0.237 <sup>a***</sup><br>(0.047)  |
| Outpatient care                                              | 0.108 <sup>a***</sup><br>(0.013) | 0.152 <sup>a***</sup><br>(0.010) | -0.049 <sup>a***</sup><br>(0.014) |

Note: Diff.: difference; CI= concentration index; SE= standard errors; dominance test: a = dominance, b= non-dominance, c= curves cross

\*, \*\*, \*\*\* statistically significant at the 10%, 5%, and 1% levels, respectively

Table A2.2 Benefit incidence of donor spending on institutional delivery

| Year                                                        | 2003                             | 2010                             | 2017                             |
|-------------------------------------------------------------|----------------------------------|----------------------------------|----------------------------------|
| Health care provider                                        | CI (SE)                          | CI (SE)                          | CI (SE)                          |
| All public health facilities (hospitals and health centers) | 0.199 <sup>a***</sup><br>(0.029) | 0.155 <sup>a***</sup><br>(0.021) | 0.013 <sup>a***</sup><br>(0.002) |
| Public hospitals                                            | 0.584 <sup>a***</sup><br>(0.092) | 0.406 <sup>a***</sup><br>(0.068) | 0.078 <sup>a***</sup><br>(0.031) |
| Public health centers                                       | 0.161 <sup>a***</sup><br>(0.031) | 0.128 <sup>a***</sup><br>(0.023) | 0.009 <sup>a***</sup><br>(0.003) |

Note: Diff.: difference; CI= concentration index; SE= standard errors; dominance test: a = dominance, b= non-dominance, c= concentration curve and line of equality cross

\*, \*\*, \*\*\* statistically significant at the 10%, 5%, and 1% levels, respectively
