# Supplementary material for: Does the implementation of UHC reforms foster greater equality in health spending? Evidence from a benefit incidence analysis in Burkina Faso
Source: HighWire-hosted journal article supplement (doi:10.1136/bmjgh-2021-005810), 2021-12-01
Supplement: bmjgh-2021-005810supp003_data_supplement.pdf [file bmjgh-2021-005810supp003_data_supplement.pdf]

### Appendix 3 – Sensitivity analysis – analysis limited to the eight regions included also in PBF dataset

#### Curative services

Table A3.1a Benefit incidence of public spending on curative care in Burkina Faso in 8 regions

| Year                                                         | 2009                            | 2014                            | 2017                             |
|--------------------------------------------------------------|---------------------------------|---------------------------------|----------------------------------|
| Health care provider                                         | CI (SE)                         | CI (SE)                         | CI (SE)                          |
| All public health facilities (inpatient and outpatient care) | 0.079 <sup>***</sup><br>(0.018) | 0.242 <sup>***</sup><br>(0.012) | -0.024 <sup>a*</sup><br>(0.014)  |
| Inpatient care (hospitals)                                   | 0.221 <sup>***</sup><br>(0.060) | 0.532 <sup>***</sup><br>(0.048) | 0.237 <sup>***</sup><br>(0.047)  |
| Outpatient care (all health facilities)                      | 0.072 <sup>***</sup><br>(0.019) | 0.223 <sup>***</sup><br>(0.014) | -0.049 <sup>***</sup><br>(0.014) |

Note: CI= concentration index; SE= standard errors; dominance test: a = dominance, b= non-dominance, c= curves cross  
\*, \*\*, \*\*\* statistically significant at the 10%, 5%, and 1% levels, respectively

Table A3.1b Benefit incidence of overall health spending on curative care in Burkina Faso in 8 regions

| Year                                                         | 2009                            | 2014                            | 2017                            |
|--------------------------------------------------------------|---------------------------------|---------------------------------|---------------------------------|
| Health care provider                                         | CI (SE)                         | CI (SE)                         | CI (SE)                         |
| All public health facilities (inpatient and outpatient care) | 0.177 <sup>***</sup><br>(0.037) | 0.292 <sup>***</sup><br>(0.019) | 0.105 <sup>***</sup><br>(0.025) |
| Inpatient care (hospitals)                                   | 0.209 <sup>***</sup><br>(0.058) | 0.363 <sup>***</sup><br>(0.043) | 0.231 <sup>***</sup><br>(0.048) |
| Outpatient care (all health facilities)                      | 0.125 <sup>***</sup><br>(0.018) | 0.236 <sup>***</sup><br>(0.014) | -0.012 <sup>b</sup><br>(0.144)  |

Note: CI= concentration index; SE= standard errors; dominance test: a = dominance, b= non-dominance, c= curves cross  
\*, \*\*, \*\*\* statistically significant at the 10%, 5%, and 1% levels, respectively

#### Institutional delivery

Table A3.2a Benefit incidence of public spending on institutional delivery in Burkina Faso in 8 regions

| Year                                                        | 2003                            | 2010                            | 2017                            |
|-------------------------------------------------------------|---------------------------------|---------------------------------|---------------------------------|
| Health care provider                                        | CI (SE)                         | CI (SE)                         | CI (SE)                         |
| All public health facilities (hospitals and health centers) | 0.145 <sup>***</sup><br>(0.042) | 0.111 <sup>***</sup><br>(0.024) | 0.013 <sup>***</sup><br>(0.002) |
| Public hospitals                                            | 0.503 <sup>***</sup><br>(0.144) | 0.285 <sup>a*</sup><br>(0.112)  | 0.078 <sup>a**</sup><br>(0.031) |
| Public health centers                                       | 0.112 <sup>a**</sup><br>(0.044) | 0.104 <sup>***</sup><br>(0.025) | 0.009 <sup>***</sup><br>(0.003) |

Note: CI= concentration index; SE= standard errors; dominance test: a = dominance, b= non-dominance, c= curves cross  
\*, \*\*, \*\*\* statistically significant at the 10%, 5%, and 1% levels, respectively

Table A3.2b Benefit incidence of overall health spending on institutional delivery in Burkina Faso in 8 regions

| Year                                                        | 2003                             | 2010                             | 2017                             |
|-------------------------------------------------------------|----------------------------------|----------------------------------|----------------------------------|
| Health care provider                                        | CI (SE)                          | CI (SE)                          | CI (SE)                          |
| All public health facilities (hospitals and health centers) | 0.173 <sup>a***</sup><br>(0.048) | 0.227 <sup>a***</sup><br>(0.049) | 0.062 <sup>a***</sup><br>(0.016) |
| Public hospitals                                            | 0.32 <sup>a**</sup><br>(0.127)   | 0.388 <sup>a***</sup><br>(0.091) | 0.095 <sup>a***</sup><br>(0.031) |
| Public health centers                                       | 0.110 <sup>a***</sup><br>(0.042) | 0.048<br>(0.031)                 | 0.024 <sup>a***</sup><br>(0.003) |

Note: CI= concentration index; SE= standard errors; dominance test: a = dominance, b= non-dominance, c= curves cross  
 \*, \*\*, \*\*\* statistically significant at the 10%, 5%, and 1% levels, respectively
